# Supplementary material
Source: Springer Nature journal article supplement (https://www.springermedizin.de/resource/supplementary/12936_2012_2765_MOESM13_ESM.pdf/9545056)

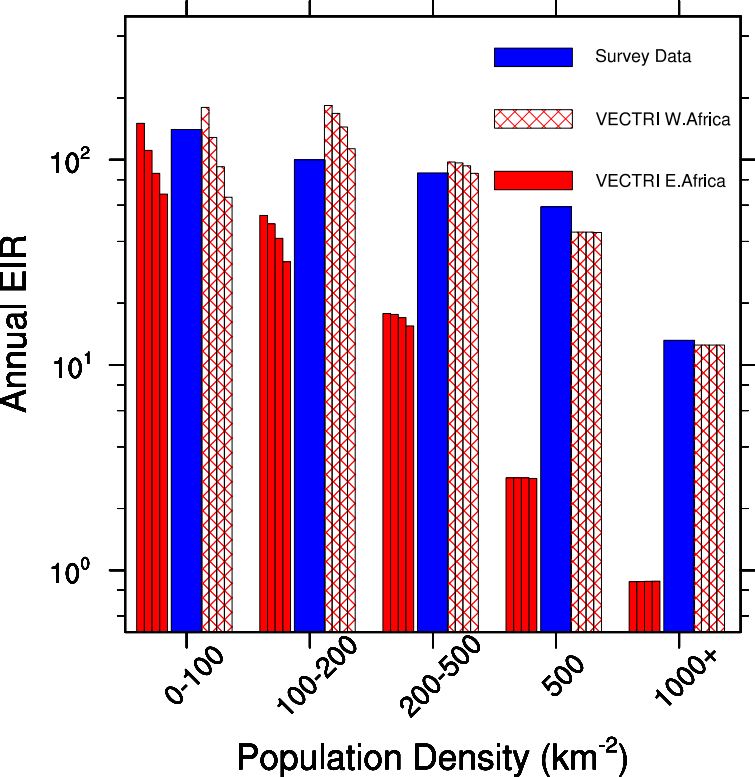

Supplement: MOESM13 [file 9545056]
